# Supplementary material for: The Burden of Adverse Drug Reactions Due to Artemisinin-Based Antimalarial Treatment in Selected Ugandan Health Facilities: An Active Follow-Up Study
Source: PubMed Central journal article supplement — Drug Saf. 2018 Apr 7;41(8):753–65. doi: 10.1007/s40264-018-0659-x (PMC6061396; doi:10.1007/s40264-018-0659-x), 2018-04-07
Supplement: 40264_2018_659_MOESM1_ESM.pdf [file 40264_2018_659_MOESM1_ESM.pdf]

## **ELECTRONIC SUPPLEMENTARY MATERIAL # 1**

### **Article title: The burden of adverse drug reactions due to Artemisinin-based anti-malarial treatment in selected Ugandan health facilities– an active follow-up study**

Helen Byomire Ndagije<sup>1</sup>, Victoria Nambasa<sup>1</sup>, Leonard Manirakiza<sup>1</sup>, Donna Kusemererwa<sup>1</sup>, Dan Kajungu<sup>2</sup>, Sten Olsson<sup>3</sup>, Niko Speybroeck<sup>4</sup>.

*<sup>1</sup>National Pharmacovigilance Centre, National Drug Authority, Kampala Uganda*

*<sup>2</sup>Makerere University Centre for Health and Population Research, Iganga, Kampala, Uganda*

*<sup>3</sup>Sten Olsson Pharmacovigilance Consulting, Uppsala, Sweden*

*<sup>4</sup>Institute of Health and Society (IRSS), Université catholique de Louvain, Brussels Belgium*

Drug Safety Journal

Corresponding Author: Helen Byomire Ndagije  
Email: [hbyomire@nda.or.ug](mailto:hbyomire@nda.or.ug)

**Questionnaire for patients**

**Pre-treatment form**

(To be completed on Day 0 or day of enrollment)

Health facility name ... \_\_\_\_\_

Health facility visit date..... 

|  |  |  |  |  |   |   |   |  |
|--|--|--|--|--|---|---|---|--|
|  |  |  |  |  | 2 | 0 | 1 |  |
|--|--|--|--|--|---|---|---|--|

**VDATE**

**SECTION 1: IDENTIFICATION AND DEMOGRAPHIC DATA**

1.1 Name of Patient:

**NAME**

1.2 Name of

Village \_\_\_\_\_

**VILLAGE**

1.3 Section of Village (Sub-village) \_\_\_\_\_

**SECTION**

1.4 Date of Birth..... 

|  |  |  |  |  |  |  |  |
|--|--|--|--|--|--|--|--|
|  |  |  |  |  |  |  |  |
|--|--|--|--|--|--|--|--|

**DOB**

1.5 Age (in years)..... 

|  |  |  |
|--|--|--|
|  |  |  |
|--|--|--|

**AGEYR**

1.6 Gender..... 

|         |           |
|---------|-----------|
| 1. Male | 2. Female |
|---------|-----------|

**SEX**

1.7 Weight (Kg) (*Put 999.9 if weight not taken*)..... 

|  |  |  |   |  |
|--|--|--|---|--|
|  |  |  | . |  |
|  |  |  | . |  |

**WEIGHT**

1.8 Height (cm) (*Put 999.9 if height not taken*)..... 

|  |  |  |  |  |  |  |  |
|--|--|--|--|--|--|--|--|
|  |  |  |  |  |  |  |  |
|--|--|--|--|--|--|--|--|

**HEIGHT**

1.9 Pregnant ..... 

|        |       |              |       |
|--------|-------|--------------|-------|
| 1. Yes | 2. No | 3. Uncertain | 8. NA |
|--------|-------|--------------|-------|

**PREG**

**Circle NA for ALL males**

1.10 Trimester ..... 

|                    |                    |                    |       |
|--------------------|--------------------|--------------------|-------|
| 1. 1 <sup>st</sup> | 2. 2 <sup>nd</sup> | 3. 3 <sup>rd</sup> | 8. NA |
|--------------------|--------------------|--------------------|-------|

**TRIME**

1.11 Patient Folder/OPD number ..... 

|  |  |  |  |  |  |   |
|--|--|--|--|--|--|---|
|  |  |  |  |  |  | / |
|--|--|--|--|--|--|---|

**PFOLD**

1.12 Name of Respondent:

**RNAM**

1.13 Patient/Respondent Phone Numbers .....

|  |  |  |  |  |  |  |  |  |  |
|--|--|--|--|--|--|--|--|--|--|
|  |  |  |  |  |  |  |  |  |  |
|  |  |  |  |  |  |  |  |  |  |

PHONE1  
PHONE2

**SECTION 2: ILLNESS AND MEDICAL INFORMATION**

2.1 What are the events (signs and symptoms) at presentation within the last five day?

2.2 Did you do any malaria diagnostic test?  
.....

|        |       |
|--------|-------|
| 1. Yes | 2. No |
|--------|-------|

MDTT

2.2.1 If yes, please record malaria diagnostic test

| Test                  | Date |   |   |   |   |   |   |   | Result (Please circle) |             |             |          |
|-----------------------|------|---|---|---|---|---|---|---|------------------------|-------------|-------------|----------|
|                       | D    | D | M | M | Y | Y | Y | Y |                        |             |             |          |
| Rapid Diagnostic Test |      |   |   |   | 2 | 0 | 1 |   | 1. Positive            | 2. Negative | 3. Not Done | MRD<br>T |
| Microscopy            |      |   |   |   | 2 | 0 | 1 |   | 1. Positive            | 2. Negative | 3. Not Done | MICR     |
| Other, specify .....  |      |   |   |   | 2 | 0 | 1 |   |                        |             |             | OTST     |

2.3 What generic of ACT was prescribed at this visit?

|         |        |          |               |
|---------|--------|----------|---------------|
| 1. ASAQ | 2. ALU | 3. DHAPQ | 4. Other..... |
|---------|--------|----------|---------------|

GENERIC

2.6 What type of ACT was prescribed??

|               |               |
|---------------|---------------|
| 1. Fixed dose | 2. Loose dose |
|---------------|---------------|

ACTYPE

2.6.1 Please specify brand name \_\_\_\_\_

**ACBRAND**

2.6.2 Specify the dosage, route and frequency

| Dose | Route | Frequency |
|------|-------|-----------|
|      |       |           |

**SECTION 3: OTHER MEDICINES:**

*Instructions: In this section, ask the patient about other medicines taken in last 14 days other than anti-malarials.*

3.1 Did you take any other drug within in last 14 days?

|        |       |
|--------|-------|
| 1. Yes | 2. No |
|--------|-------|

**If no, go to section 4**

3.2 What is the name of the drug? (Ask the patient if he/she has carried the medicine and ask to see it if possible, record the brand name) \_\_\_\_\_

3.3 Did you experience any side effects after taking the drug you mentioned above? 

|        |       |
|--------|-------|
| 1. Yes | 2. No |
|--------|-------|

3.4 Did you experience any of the following?

| Symptom        | New | Worsening | Symptom         | New | Worsening |
|----------------|-----|-----------|-----------------|-----|-----------|
| Vomiting       |     |           | Abdominal pains |     |           |
| Headache       |     |           | Cough           |     |           |
| Body/skin rash |     |           | Itching         |     |           |
| Drowsiness     |     |           | Nausea          |     |           |
| Weakness       |     |           | Cold            |     |           |
| Dizziness      |     |           | Convulsion      |     |           |
| Diarrhoea      |     |           | Insomnia        |     |           |
| Other          |     |           | Other           |     |           |

3.5 Has the reaction stopped? 

|        |       |
|--------|-------|
| 1. Yes | 2. No |
|--------|-------|

3.6. What did they do, when you reported the ADR?

|                     |                 |            |                    |
|---------------------|-----------------|------------|--------------------|
| 1. Medicine stopped | 2. Dose reduced | 3. Nothing | 4. Other (Specify) |
|---------------------|-----------------|------------|--------------------|

3.7 How are you feeling at the moment?

|                       |                        |                        |
|-----------------------|------------------------|------------------------|
| 1. Reaction recovered | 2. Reaction recovering | 3. Reaction continuing |
|-----------------------|------------------------|------------------------|

**SECTION 4: FOLLOW UP DETAILS**

4.1 Name of nearest contact person for patient follow-up \_\_\_\_\_  
**NCONTACT**

4.2 Nearest Contact Person Phone Number(s)..... 

|  |  |  |  |  |  |  |  |  |  |
|--|--|--|--|--|--|--|--|--|--|
|  |  |  |  |  |  |  |  |  |  |
|  |  |  |  |  |  |  |  |  |  |

**NPHONE1**  
**NPHONE2**

4.3 Date of planned follow-up visit: ..... 

|  |  |  |  |  |   |   |   |  |
|--|--|--|--|--|---|---|---|--|
|  |  |  |  |  | 2 | 0 | 1 |  |
|--|--|--|--|--|---|---|---|--|

**DFOLLOW**

4.4. Name of research Assistant: ..... 

|  |  |
|--|--|
|  |  |
|--|--|

**FW**

**Patient follow-up/ Post-treatment form**  
 (To be completed on Day 3, 7 and 14 and **not** on day of enrollment)

**SECTION 1: IDENTIFICATION AND FOLLOW UP DETAILS**

1.1 Name of Patient: \_\_\_\_\_  
**NAME**

1.2 Date of follow-up visit 

|  |  |  |  |   |   |   |  |
|--|--|--|--|---|---|---|--|
|  |  |  |  | 2 | 0 | 1 |  |
|--|--|--|--|---|---|---|--|

**FODATE**

1.3 Type of follow-up visit 

|             |               |             |                          |
|-------------|---------------|-------------|--------------------------|
| 1. HF visit | 2. Home visit | 3. By phone | 4. Other (specify) ..... |
|-------------|---------------|-------------|--------------------------|

**FOTYPE**

**SECTION 2 : MEDICATION AND POST CLINICAL INFORMATION**

2.1 Did you take the malaria medicine you were given at the health facility? 

|        |    |
|--------|----|
| 1. Yes | No |
|--------|----|

**MMED**

*If No, thank the participant and end Interview. If Yes, proceed to 2.2)*

2.2 What is the generic name of the ACT? 

|         |        |          |                |
|---------|--------|----------|----------------|
| 1. ASAQ | 2. ALU | 3. DHAPQ | 4. Other ..... |
|---------|--------|----------|----------------|

**GENERIC**

2.2.1 What type of ACT did you take? 

|               |               |
|---------------|---------------|
| 1. Fixed dose | 2. Loose dose |
|---------------|---------------|

**TYPE**

2.2.2 Please, specify brand name \_\_\_\_\_  
**BRAND**

*(If No, thank the participant and end Interview. If Yes, proceed to 2.2.4)*

2.2.3 Have you experienced any new symptoms or worsening of the old ones since you took the medication? 

|        |       |
|--------|-------|
| 1. Yes | 2. No |
|--------|-------|

**EXP\_SYMP**

2.2.4 Please, circle any symptoms you experienced which appear in the following table and tick (✓) whether it is **New** or **Worsening** in the corresponding box

| Symptom   | New | Worsening | Symptom         | New | Worsening |
|-----------|-----|-----------|-----------------|-----|-----------|
| Vomiting  |     |           | Abdominal pains |     |           |
| Headache  |     |           | Cough           |     |           |
| Body/skin |     |           | Itching         |     |           |

|            |  |  |            |  |  |
|------------|--|--|------------|--|--|
| rash       |  |  |            |  |  |
| Drowsiness |  |  | Nausea     |  |  |
| Weakness   |  |  | Cold       |  |  |
| Dizziness  |  |  | Convulsion |  |  |
| Diarrhoea  |  |  | Insomnia   |  |  |
| Other      |  |  | Other      |  |  |

Please describe any other symptoms experienced apart from those mentioned above, stating whether **New** or **Worsening**

**SECTION 3 : SUPERVISION AND QUALITY CHECK**

3.1 Fieldworker’s Code: .....

3.2 Supervisor’s Code: .....

3.3 Form reviewed by: .....

|  |  |           |
|--|--|-----------|
|  |  | <b>FW</b> |
|  |  | <b>FS</b> |
|  |  | <b>RB</b> |

**Note:** Please **NOTIFY** the Coordinator **IMMEDIATELY** if the adverse event is:

- Inability to undertake normal activities
- Life-threatening
- Resulted in persistent incapacity on disability
- Caused or prolonged hospitalization
- Resulted in congenital or birth defects
- Occurred in pregnant women
- Resulted from overdose or medication error
- Associated with a new drug
