# Supplementary material for: The Burden of Adverse Drug Reactions Due to Artemisinin-Based Antimalarial Treatment in Selected Ugandan Health Facilities: An Active Follow-Up Study
Source: PubMed Central journal article supplement — Drug Saf. 2018 Apr 7;41(8):753–65. doi: 10.1007/s40264-018-0659-x (PMC6061396; doi:10.1007/s40264-018-0659-x), 2018-04-07
Supplement: 40264_2018_659_MOESM2_ESM.pdf [file 40264_2018_659_MOESM2_ESM.pdf]

## **ELECTRONIC SUPPLEMENTARY MATERIAL # 2**

### **Article title: The burden of adverse drug reactions due to Artemisinin-based anti-malarial treatment in selected Ugandan health facilities— an active follow-up study.**

Helen Byomire Ndagije<sup>1</sup>, Victoria Nambasa<sup>1</sup>, Leonard Manirakiza<sup>1</sup>, Donna Kusemererwa<sup>1</sup>, Dan Kajungu<sup>2</sup>, Sten Olsson<sup>3</sup>, Niko Speybroeck<sup>4</sup>.

<sup>1</sup>*National Pharmacovigilance Centre, National Drug Authority, Kampala Uganda*

<sup>2</sup>*Makerere University Centre for Health and Population Research, Iganga, Kampala, Uganda*

<sup>3</sup>*Sten Olsson Pharmacovigilance Consulting, Uppsala, Sweden*

<sup>4</sup>*Institute of Health and Society (IRSS), Université catholique de Louvain, Brussels Belgium*

Drug Safety Journal

Corresponding Author: Helen Byomire Ndagije

Email: [hbyomire@nda.or.ug](mailto:hbyomire@nda.or.ug)

# Suspected Adverse Drug Reaction Reporting Form- FORM

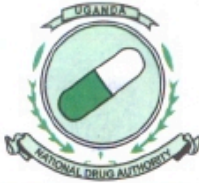

**CONFIDENTIAL**

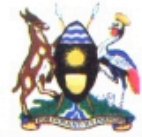

REPUBLIC OF UGANDA  
MINISTRY OF HEALTH

## SUSPECTED ADVERSE DRUG REACTION REPORTING FORM

| A. PATIENT DETAILS                                                                                                                                                                               |            |                                                              |                                |                                                                                   |                               |                                           |          |
|--------------------------------------------------------------------------------------------------------------------------------------------------------------------------------------------------|------------|--------------------------------------------------------------|--------------------------------|-----------------------------------------------------------------------------------|-------------------------------|-------------------------------------------|----------|
| Patient name                                                                                                                                                                                     |            | Patient Number                                               |                                |                                                                                   | Sex: M/F*                     |                                           |          |
| Age at time of onset(yrs)*                                                                                                                                                                       |            | Health Facility                                              |                                |                                                                                   | Last Menstrual Period         |                                           |          |
| Weight (kg)                                                                                                                                                                                      |            | District                                                     |                                |                                                                                   | Trimester (if pregnant)       |                                           |          |
| B. SUSPECTED DRUG (S) DETAILS                                                                                                                                                                    |            |                                                              |                                |                                                                                   |                               |                                           |          |
| Generic Name*                                                                                                                                                                                    | Brand Name | Dose ,Route<br>Frequency                                     | Date*<br>started               | Date<br>stopped                                                                   | Prescribed<br>for             | Expiry<br>date                            | Batch No |
|                                                                                                                                                                                                  |            |                                                              |                                |                                                                                   |                               |                                           |          |
|                                                                                                                                                                                                  |            |                                                              |                                |                                                                                   |                               |                                           |          |
| C. SUSPECTED REACTIONS                                                                                                                                                                           |            |                                                              |                                |                                                                                   |                               |                                           |          |
| Please describe the reaction as observed and any treatment given to manage the reaction                                                                                                          |            |                                                              |                                |                                                                                   |                               |                                           |          |
|                                                                                                                                                                                                  |            |                                                              |                                |                                                                                   |                               |                                           |          |
| <b>Outcome</b><br>Recovered <input type="checkbox"/> Recovering <input type="checkbox"/> Continuing <input type="checkbox"/> Death due to reaction <input type="checkbox"/>                      |            |                                                              |                                |                                                                                   |                               |                                           |          |
| Date reaction started*                                                                                                                                                                           |            | Date reaction stopped                                        |                                |                                                                                   | Date of notification          |                                           |          |
|                                                                                                                                                                                                  |            |                                                              |                                |                                                                                   |                               |                                           |          |
| SERIOUSNESS OF THE REACTION                                                                                                                                                                      |            |                                                              |                                |                                                                                   |                               |                                           |          |
| Patient died <input type="checkbox"/>                                                                                                                                                            |            | Prolonged inpatient Hospitalization <input type="checkbox"/> |                                | Involved disability <input type="checkbox"/>                                      |                               | Life Threatening <input type="checkbox"/> |          |
| Congenital abnormality <input type="checkbox"/>                                                                                                                                                  |            |                                                              |                                |                                                                                   |                               |                                           |          |
| D. CONCOMITANT DRUGS                                                                                                                                                                             |            |                                                              |                                |                                                                                   |                               |                                           |          |
| Please give information on the drug(s) the patient has been taking together with the suspected drug including those taken for chronic diseases (include self medication and herbal preparations) |            |                                                              |                                |                                                                                   |                               |                                           |          |
| Generic                                                                                                                                                                                          | Name Brand | Dosage                                                       | Date started                   | Date stopped                                                                      | Indication(prescribed or OTC) |                                           |          |
|                                                                                                                                                                                                  |            |                                                              |                                |                                                                                   |                               |                                           |          |
| Relevant laboratory tests including dates                                                                                                                                                        |            |                                                              |                                | Additional relevant information (medical history, allergies, failure of efficacy) |                               |                                           |          |
|                                                                                                                                                                                                  |            |                                                              |                                |                                                                                   |                               |                                           |          |
| E. REPORTER'S DETAILS                                                                                                                                                                            |            |                                                              |                                |                                                                                   |                               |                                           |          |
| Name/designation*                                                                                                                                                                                |            |                                                              | Telephone and Email<br>Address |                                                                                   | Date of reporting             | Health facility                           |          |
|                                                                                                                                                                                                  |            |                                                              |                                |                                                                                   |                               |                                           |          |

\* Mandatory field

## Suspected Adverse Drug Reaction Reporting Form-BACK

|                                                                                                                                                                                                                                                                                                                                                                                                                                                                                                                                                                                                                                                                                                                                                                                                                                                                                                                                                                                                                                                                                                                                                                                                                                                                                                                                                                                                                                                                                                                                                                                                                                                                                                                                                                                                                                                                                                                                                                                                                                                                                                                                                                                                                                                                                                                        |                                                                                                                                                                                                                                                                                                                                                                                                                                                                                                                                                                                                                                                                                                                                                                                                                                                                                                                                                                                                                                                                                                                                                                                                                                                                                                                                                                                                                                                                                                                                                                                                                                                                                                                                                                                                                                                            |
|------------------------------------------------------------------------------------------------------------------------------------------------------------------------------------------------------------------------------------------------------------------------------------------------------------------------------------------------------------------------------------------------------------------------------------------------------------------------------------------------------------------------------------------------------------------------------------------------------------------------------------------------------------------------------------------------------------------------------------------------------------------------------------------------------------------------------------------------------------------------------------------------------------------------------------------------------------------------------------------------------------------------------------------------------------------------------------------------------------------------------------------------------------------------------------------------------------------------------------------------------------------------------------------------------------------------------------------------------------------------------------------------------------------------------------------------------------------------------------------------------------------------------------------------------------------------------------------------------------------------------------------------------------------------------------------------------------------------------------------------------------------------------------------------------------------------------------------------------------------------------------------------------------------------------------------------------------------------------------------------------------------------------------------------------------------------------------------------------------------------------------------------------------------------------------------------------------------------------------------------------------------------------------------------------------------------|------------------------------------------------------------------------------------------------------------------------------------------------------------------------------------------------------------------------------------------------------------------------------------------------------------------------------------------------------------------------------------------------------------------------------------------------------------------------------------------------------------------------------------------------------------------------------------------------------------------------------------------------------------------------------------------------------------------------------------------------------------------------------------------------------------------------------------------------------------------------------------------------------------------------------------------------------------------------------------------------------------------------------------------------------------------------------------------------------------------------------------------------------------------------------------------------------------------------------------------------------------------------------------------------------------------------------------------------------------------------------------------------------------------------------------------------------------------------------------------------------------------------------------------------------------------------------------------------------------------------------------------------------------------------------------------------------------------------------------------------------------------------------------------------------------------------------------------------------------|
| <p><b>What to report</b><br/>Report all adverse drug reactions/events suspected both serious and those that are not serious.<br/>report any adverse reaction even if you are not certain the product caused the event</p> <p>A reaction is serious when the patient outcome is:</p> <ul style="list-style-type: none"> <li><input type="checkbox"/> Is fatal</li> <li><input type="checkbox"/> Is life-threatening</li> <li><input type="checkbox"/> Is permanently/Significantly disabling</li> <li><input type="checkbox"/> Requires or prolongs hospitalization</li> <li><input type="checkbox"/> Causes a congenital anomaly</li> <li><input type="checkbox"/> Requires intervention to prevent permanent impairment or damage.</li> </ul> <p>For product quality report problems such as:</p> <ul style="list-style-type: none"> <li><input type="checkbox"/> Questionable stability</li> <li><input type="checkbox"/> Poor packaging or labeling</li> <li><input type="checkbox"/> Expired drugs</li> <li><input type="checkbox"/> Suspected contamination</li> <li><input type="checkbox"/> Defective components</li> <li><input type="checkbox"/> Therapeutic failures</li> </ul> <p><b>WHEN TO REPORT</b></p> <ul style="list-style-type: none"> <li><input type="checkbox"/> report the event soon after it occurs</li> </ul> <p><b>WHO IS TO REPORT</b></p> <ul style="list-style-type: none"> <li><input type="checkbox"/> All Healthcare Providers e.g. Doctors, Dentists, Pharmacists, Midwives, Nurses and Allied Health Professionals in Uganda should report as part of their professional responsibility report any suspected adverse drug reactions</li> </ul> <p><b>WHERE TO REPORT</b></p> <ul style="list-style-type: none"> <li><input type="checkbox"/> reports should be sent to the national centre</li> <li><input type="checkbox"/> reports can also be sent to the regional centres</li> <li><input type="checkbox"/> NDA regional offices ( Zonal plus regional)</li> </ul> <p><b>How to report</b></p> <ul style="list-style-type: none"> <li><input type="checkbox"/> fill in the sections that apply to your report</li> <li><input type="checkbox"/> Start date of administration for the suspected drug and the date when the suspected reaction occurred are mandatory.</li> </ul> | <p><b>How to recognize Adverse Drug Reactions in a Patient</b></p> <ul style="list-style-type: none"> <li><input type="checkbox"/> Take proper history and conduct proper examination of the patient.</li> <li><input type="checkbox"/> Ensure that the medicine ordered is the medicine received and actually taken by the patient at the dose advised.</li> <li><input type="checkbox"/> Verify that the onset of the suspected ADR was after the drug was taken, not before and discuss carefully the observation made by the patient.</li> <li><input type="checkbox"/> Determine the time interval between the beginning of drug treatment and the onset of the event.</li> <li><input type="checkbox"/> Evaluate the suspected ADR after discontinuing the drugs or reducing the dose and monitor the patient's status (De-challenge). If appropriate, restart the drug treatment and monitor recurrence of any adverse events (Re-challenge).</li> <li><input type="checkbox"/> Analyze the alternative causes (other than the drug) that could on their own have caused the reaction.</li> <li><input type="checkbox"/> Use relevant up-to date literature and personal experience as a health professional on drugs and their ADRs and verify if there are previous conclusive reports on this reaction</li> </ul> <p><b>please note</b> that submission of a report doesn't imply that the health worker or the product caused or contributed to the adverse event</p> <p style="text-align: center;"><b>Address</b><br/><b>Executive Secretary/Registrar</b><br/><b>National Drug Authority</b><br/><b>Plot66-48 Lumumba Avenue</b><br/><b>P.O.Box23096 Kampala</b><br/><b>Tel: +256 414-255665/347391</b><br/><b>email:<a href="mailto:ndaug@nda.or.ug">ndaug@nda.or.ug</a>/<a href="mailto:druginfo@nda.or.ug">druginfo@nda.or.ug</a></b></p> |
|------------------------------------------------------------------------------------------------------------------------------------------------------------------------------------------------------------------------------------------------------------------------------------------------------------------------------------------------------------------------------------------------------------------------------------------------------------------------------------------------------------------------------------------------------------------------------------------------------------------------------------------------------------------------------------------------------------------------------------------------------------------------------------------------------------------------------------------------------------------------------------------------------------------------------------------------------------------------------------------------------------------------------------------------------------------------------------------------------------------------------------------------------------------------------------------------------------------------------------------------------------------------------------------------------------------------------------------------------------------------------------------------------------------------------------------------------------------------------------------------------------------------------------------------------------------------------------------------------------------------------------------------------------------------------------------------------------------------------------------------------------------------------------------------------------------------------------------------------------------------------------------------------------------------------------------------------------------------------------------------------------------------------------------------------------------------------------------------------------------------------------------------------------------------------------------------------------------------------------------------------------------------------------------------------------------------|------------------------------------------------------------------------------------------------------------------------------------------------------------------------------------------------------------------------------------------------------------------------------------------------------------------------------------------------------------------------------------------------------------------------------------------------------------------------------------------------------------------------------------------------------------------------------------------------------------------------------------------------------------------------------------------------------------------------------------------------------------------------------------------------------------------------------------------------------------------------------------------------------------------------------------------------------------------------------------------------------------------------------------------------------------------------------------------------------------------------------------------------------------------------------------------------------------------------------------------------------------------------------------------------------------------------------------------------------------------------------------------------------------------------------------------------------------------------------------------------------------------------------------------------------------------------------------------------------------------------------------------------------------------------------------------------------------------------------------------------------------------------------------------------------------------------------------------------------------|
