# Supplementary material for: The Burden of Adverse Drug Reactions Due to Artemisinin-Based Antimalarial Treatment in Selected Ugandan Health Facilities: An Active Follow-Up Study
Source: PubMed Central journal article supplement — Drug Saf. 2018 Apr 7;41(8):753–65. doi: 10.1007/s40264-018-0659-x (PMC6061396; doi:10.1007/s40264-018-0659-x), 2018-04-07
Supplement: 40264_2018_659_MOESM3_ESM.pdf [file 40264_2018_659_MOESM3_ESM.pdf]

## **ELECTRONIC SUPPLEMENTARY MATERIAL # 3**

### **Article title: The burden of adverse drug reactions due to Artemisinin-based anti-malarial treatment in selected Ugandan health facilities– an active follow-up study.**

Helen Byomire Ndagije<sup>1</sup>, Victoria Nambasa<sup>1</sup>, Leonard Manirakiza<sup>1</sup>, Donna Kusemererwa<sup>1</sup>, Dan Kajungu<sup>2</sup>, Sten Olsson<sup>3</sup>, Niko Speybroeck<sup>4</sup>.

<sup>1</sup>*National Pharmacovigilance Centre, National Drug Authority, Kampala Uganda*

<sup>2</sup>*Makerere University Centre for Health and Population Research, Iganga, Kampala, Uganda*

<sup>3</sup>*Sten Olsson Pharmacovigilance Consulting, Uppsala, Sweden*

<sup>4</sup>*Institute of Health and Society (IRSS), Université catholique de Louvain, Brussels Belgium*

Drug Safety Journal

Corresponding Author: Helen Byomire Ndagije  
Email: [hbyomire@nda.or.ug](mailto:hbyomire@nda.or.ug)

## NARANJO ALGORITHM

| Naranjo Adverse Drug Reaction Probability Scale                                                                     |     |    |             |
|---------------------------------------------------------------------------------------------------------------------|-----|----|-------------|
| Question                                                                                                            | Yes | No | Do Not Know |
| 1.Are there previous <i>conclusive</i> reports on this reaction?                                                    | +1  | 0  | 0           |
| 2.Did the adverse event appear after the suspected drug was administered?                                           | +2  | -1 | 0           |
| 3.Did the adverse reaction improve when the drug was discontinued or a <i>specific</i> antagonist was administered? | +1  | 0  | 0           |
| 4.Did the adverse event reappear when the drug was re-administered?                                                 | +2  | -1 | 0           |
| 5.Are there alternative causes (other than the drug) that could on their own have caused the reaction?              | -1  | +2 | 0           |
| 6.Did the reaction reappear when a placebo was given?                                                               | -1  | +1 | 0           |
| 7.Was the drug detected in blood (or other fluids) in concentrations known to be toxic?                             | +1  | 0  | 0           |
| 8.Was the reaction more severe when the dose was increased or less severe when the dose was decreased?              | +1  | 0  | 0           |
| 9.Did the patient have a similar reaction to the same or similar drugs in any previous exposure?                    | +1  | 0  | 0           |
| 10.Was the adverse event confirmed by any objective evidence?                                                       | +1  | 0  | 0           |
| <b>TOTAL SCORE:</b>                                                                                                 |     |    |             |

Modified from: Naranjo CA et al. A method for estimating the probability of adverse drug reactions. Clin Pharmacol Ther 1981; 30: 239245.
