# Supplementary material for: The Burden of Adverse Drug Reactions Due to Artemisinin-Based Antimalarial Treatment in Selected Ugandan Health Facilities: An Active Follow-Up Study
Source: PubMed Central journal article supplement — Drug Saf. 2018 Apr 7;41(8):753–65. doi: 10.1007/s40264-018-0659-x (PMC6061396; doi:10.1007/s40264-018-0659-x), 2018-04-07
Supplement: 40264_2018_659_MOESM4_ESM.pdf [file 40264_2018_659_MOESM4_ESM.pdf]

## **ELECTRONIC SUPPLEMENTARY MATERIAL # 4**

**Article title: The burden of adverse drug reactions due to Artemisinin-based anti-malarial treatment in selected Ugandan health facilities– an active follow-up study.**

Helen Byomire Ndagije<sup>1</sup>, Victoria Nambasa<sup>1</sup>, Leonard Manirakiza<sup>1</sup>, Donna Kusemererwa<sup>1</sup>, Dan Kajungu<sup>2</sup>, Sten Olsson<sup>3</sup>, Niko Speybroeck<sup>4</sup>.

<sup>1</sup>*National Pharmacovigilance Centre, National Drug Authority, Kampala Uganda*

<sup>2</sup>*Makerere University Centre for Health and Population Research, Iganga, Kampala, Uganda*

<sup>3</sup>*Sten Olsson Pharmacovigilance Consulting, Uppsala, Sweden*

<sup>4</sup>*Institute of Health and Society (IRSS), Université catholique de Louvain, Brussels Belgium*

Drug Safety Journal

Corresponding Author: Helen Byomire Ndagije  
Email: [hbyomire@nda.or.ug](mailto:hbyomire@nda.or.ug)

## The ADR Preventability Assessment Tool

| The criteria for Adverse Drug Reactions' Preventability Assessment |                                                                                                                               |     |    |         |                |
|--------------------------------------------------------------------|-------------------------------------------------------------------------------------------------------------------------------|-----|----|---------|----------------|
| Factors related to                                                 | Preventability Criteria                                                                                                       | Yes | No | Unknown | Not applicable |
| <b>Professional Practice "Pr"</b>                                  | 1. Incorrect dose?                                                                                                            |     |    |         |                |
|                                                                    | 2. Incorrect drug administration route?                                                                                       |     |    |         |                |
|                                                                    | 3. Incorrect drug administration duration?                                                                                    |     |    |         |                |
|                                                                    | 4. Incorrect drug formulation administered?                                                                                   |     |    |         |                |
|                                                                    | 5. Expired drug administered?                                                                                                 |     |    |         |                |
|                                                                    | 6. Incorrect storage of drug                                                                                                  |     |    |         |                |
|                                                                    | 7. Drug administration error (timing, rate, frequency, technique, preparation, manipulation, mixing)                          |     |    |         |                |
|                                                                    | 8. Wrong indication?                                                                                                          |     |    |         |                |
|                                                                    | 9. Inappropriate prescription according to the characteristics of the patient (age, sex, pregnancy, other)                    |     |    |         |                |
|                                                                    | 10. Inappropriate prescription for patient's clinical condition (renal failure, hepatic failure,...) or underlying pathology? |     |    |         |                |
|                                                                    | 11. Documented hypersensitivity to administered drug or drug class?                                                           |     |    |         |                |
|                                                                    | 12. Labeled drug-drug interaction?                                                                                            |     |    |         |                |
|                                                                    | 13. Therapeutic duplication? (Prescription of 2 medicines or more with similar ingredient)                                    |     |    |         |                |
|                                                                    | 14. Necessary medication not given?                                                                                           |     |    |         |                |
|                                                                    | 15. Withdrawal syndrome? (due to abrupt discontinuation of treatment.                                                         |     |    |         |                |
|                                                                    | 16. Incorrect laboratory or clinical monitoring of treatment.                                                                 |     |    |         |                |
| <b>Product/Drug "Pd"</b>                                           | 17. Poor quality drug administered?                                                                                           |     |    |         |                |
|                                                                    | 18. Counterfeit drug administered?                                                                                            |     |    |         |                |
| <b>Patient "Pa"</b>                                                | 19. Non-compliance?                                                                                                           |     |    |         |                |
|                                                                    | 20. Self medication with non-OTC?                                                                                             |     |    |         |                |

Reference: Preventability Method [Internet]. Morocco; Available from: <http://www.monitoringmedicines.org/graphics/26526.pdf>
